# Supplementary material for: Toward Blockchain Technology in the Energy Environment
Source: MDPI journal article supplement (doi:10.3390/su13169008), 2021-08-12
Supplement: s1 [file s1]

## Definition of key terms

| No | Term                   | Definition                                                                                                                                                                                                 |
|----|------------------------|------------------------------------------------------------------------------------------------------------------------------------------------------------------------------------------------------------|
| 1  | Blockchain             | Is a distributed, unchangeable ledger that makes recording transactions and managing assets in a corporate network much easier.                                                                            |
| 2  | Cryptocurrency         | Is a digital or virtual currencies protected by cryptography, making them difficult to counterfeit or double-spend. Numerous cryptocurrencies use blockchain technology.                                   |
| 3  | Consensus              | A consensus mechanism is a fault-tolerant mechanism used in computer and blockchain systems to achieve distributed process or multi-agent agreement on a single data value or network state.               |
| 4  | V2G                    | A concept that allows plug-in vehicles to provide demand-response services to the power grid, allowing them to operate as a kind of distributed energy storage.                                            |
| 5  | Smart contracts        | Are blockchain-based programs that run when certain conditions are met. They are typically used to automate the execution of an agreement so that all participants are immediately certain of the outcome. |
| 6  | Bitcoin                | Is a digital or virtual currency created in 2009 that uses peer-to-peer technology to facilitate instant payments.                                                                                         |
| 7  | Ethereum               | Is a Bitcoin-like blockchain computer application. It can be used to build automated contracts or to distribute Ether, a digital money.                                                                    |
| 8  | Disintermediation      | Disintermediation is the reduction of middlemen between producers and consumers. This means two-party transactions are possible without a third party.                                                     |
| 9  | Tamper-proof transfers | A list of transactions that may include payments or asset transfers.                                                                                                                                       |
| 10 | Federated learning     | Is a machine learning technique that uses numerous decentralized edge devices or servers to train an algorithm without exchanging data samples.                                                            |
